# Supplementary material for: Prevalence of Periodontitis in Patients with Established Rheumatoid Arthritis: A Swedish Population Based Case-Control Study
Source: PubMed Central journal article supplement (PMC4874595; doi:10.1371/journal.pone.0155956), 2016-05-20
Supplement: pone.0155956.s001.pdf [file pone.0155956.s001.pdf]

**S1 Table. Characteristics of the total EIRA study population and the subjects identified in DHR.**

| Characteristics                    |                      | EIRA                   |                        | DHR                    |                        |
|------------------------------------|----------------------|------------------------|------------------------|------------------------|------------------------|
|                                    |                      | RA cases<br>(n = 2740) | Controls<br>(n = 3942) | RA cases<br>(n = 2343) | Controls<br>(n = 3386) |
| <b>Gender</b>                      |                      |                        |                        |                        |                        |
|                                    | Male                 | 764 (28)               | 1109 (28)              | 624 (27)               | 917 (27)               |
|                                    | Female               | 1976 (72)              | 2833 (72)              | 1719 (73)              | 2469 (73)              |
| <b>Age</b>                         |                      |                        |                        |                        |                        |
|                                    | 18-29 years          | 221 (8)                | 327 (8)                | 168 (7)                | 247 (7)                |
|                                    | 30-39 years          | 336 (12)               | 501 (13)               | 280 (12)               | 413 (12)               |
|                                    | 40-49 years          | 486 (18)               | 687 (17)               | 408 (17)               | 597 (18)               |
|                                    | 50-59 years          | 853 (31)               | 1195 (30)              | 760 (32)               | 1056 (31)              |
|                                    | 60-70 years          | 844 (31)               | 1231 (31)              | 727 (31)               | 1072 (32)              |
| <b>ACPA status</b>                 |                      |                        |                        |                        |                        |
|                                    | ACPA-positive        | 1742 (64)              | N/A                    | 1469 (63)              | N/A                    |
|                                    | ACPA-negative        | 968 (35)               | N/A                    | 852 (36)               | N/A                    |
| <b>Smoking habits</b>              |                      |                        |                        |                        |                        |
|                                    | Never smokers        | 881 (32)               | 1664 (42)              | 777 (33)               | 1459 (44)              |
|                                    | Ex-smokers           | 857 (31)               | 1092 (28)              | 757 (32)               | 965 (29)               |
|                                    | Current smokers      | 733 (27)               | 763 (19)               | 576 (25)               | 588 (18)               |
|                                    | Non-regular smokers  | 260 (9)                | 387 (10)               | 226 (10)               | 341 (10)               |
| <b>Education</b>                   |                      |                        |                        |                        |                        |
|                                    | University degree    | 625 (23)               | 1177 (30)              | 567 (24)               | 1066 (31)              |
|                                    | No university degree | 2112 (77)              | 2749 (70)              | 1774 (76)              | 2307 (68)              |
| <b>Self-reported periodontitis</b> |                      |                        |                        |                        |                        |
|                                    | Yes                  | 499 (18)               | 624 (16)               | 410 (17)               | 526 (16)               |
|                                    | No                   | 2237 (82)              | 3314 (84)              | 1931 (82)              | 2856 (84)              |

Results are presented as numbers (%). EIRA, Epidemiological Investigation of Rheumatoid Arthritis; DHR, Dental Health Registry; RA, rheumatoid arthritis; ACPA, anti-citrullinated protein antibody.

N/A, not applicable.
