# Supplementary material for: Prevalence of Periodontitis in Patients with Established Rheumatoid Arthritis: A Swedish Population Based Case-Control Study
Source: PubMed Central journal article supplement (PMC4874595; doi:10.1371/journal.pone.0155956), 2016-05-20
Supplement: pone.0155956.s002.pdf [file pone.0155956.s002.pdf]

**S2 Table. Validation of the diagnosis of periodontitis obtained from DHR compared to dental records.**

|                           | <b>%</b> | <b>95% CI</b> |
|---------------------------|----------|---------------|
| Sensitivity               | 77       | 65-86         |
| Specificity               | 71       | 49-87         |
| Positive predictive value | 89       | 78-95         |

DHR, Dental Health Registry; CI, confidence interval.
