# Supplementary material for: Prevalence of Periodontitis in Patients with Established Rheumatoid Arthritis: A Swedish Population Based Case-Control Study
Source: PubMed Central journal article supplement (PMC4874595; doi:10.1371/journal.pone.0155956), 2016-05-20
Supplement: pone.0155956.s003.pdf [file pone.0155956.s003.pdf]

**S3 Table. EIRA participants, RA cases and controls, without periodontal diagnostic codes (no diagnosis) and participants not identified (missing) in DHR.**

| Diagnosis                       | RA cases     |          | Controls     |          |
|---------------------------------|--------------|----------|--------------|----------|
|                                 | No diagnosis | Missing  | No diagnosis | Missing  |
| Gingivitis                      | 1537 (56)    | 414 (15) | 2170 (55)    | 572 (15) |
| Periodontitis                   | 1567 (57)    | 406 (15) | 2268 (58)    | 576 (15) |
| Increased risk periodontitis    | 1720 (63)    | 418 (15) | 2421 (62)    | 582 (15) |
| Peri-implantitis                | 2202 (81)    | 424 (16) | 3203 (81)    | 592 (15) |
| Increased risk peri-implantitis | 2294 (84)    | 424 (16) | 3322 (84)    | 593 (15) |

Results are presented as numbers (%). EIRA, Epidemiological Investigation of Rheumatoid Arthritis; DHR, Dental Health Registry; RA, rheumatoid arthritis.
